# Supplementary material for: Use of Online Dietary Recalls among Older UK Adults: A Feasibility Study of an Online Dietary Assessment Tool
Source: MDPI journal article supplement (doi:10.3390/nu11071451), 2019-06-27
Supplement: s1 [file s1]

**Supplementary Table S1: Comparison of participants missing TRQ compared to those who completed the TRQ**

|                              | TRQ missing (n=73)<br>median (interquartile range) | TRQ completed (n=209)<br>median (interquartile range) |
|------------------------------|----------------------------------------------------|-------------------------------------------------------|
| Age at recruitment (years)   | 70.8 (67.3 – 74.9)                                 | 71.9 (68.1 – 75.4)                                    |
| Education (years)            | 16.0 (13.0 – 18.0)                                 | 16.0 (14.0 – 18.0)                                    |
|                              | n (%)                                              | n (%)                                                 |
| Female                       | 37 (50.7)                                          | 104 (49.8)                                            |
| Number of recalls completed: |                                                    |                                                       |
| 0                            | 23 (31.5)                                          | 71 (33.9)                                             |
| 1                            | 23 (31.5)                                          | 31 (14.8)                                             |
| 2                            | 15 (20.6)                                          | 44 (21.1)                                             |
| 3                            | 12 (16.4)                                          | 63 (30.1)                                             |
